# Supplementary material for: Biodegradable photothermal thermosensitive hydrogels treat osteosarcoma by reprogramming macrophages
Source: Royal Society of Chemistry journal article supplement (doi:10.1039/d2bm01900k), 2023-01-01
Supplement: d2bm01900k2.pdf [file d2bm01900k2.pdf]

## Supplementary Information

### **Biodegradable photothermal thermosensitive hydrogel treats osteosarcoma by reprogramming macrophages**

*Guowen Luo, Ziyang Xu, Hua Zhong, Hongwei Shao, Hongyi Liao, Nan Liu, Xulin Jiang\*, Yu Zhang\*, Xiongfa Ji\**

L.G., X.Z., S.H., L.H., L.N. and Prof. Z.Y

School of Medicine, South China University of Technology, Guangzhou, 510006,  
China

E-mail: luck\_2001@126.com

L.G., X.Z., S.H., L.H., L.N., Prof. Z.Y and Dr. J.X.

Department of Orthopedics, Guangdong Provincial People's Hospital (Guangdong  
Academy of Medical Sciences), Southern Medical University, Guangzhou,  
Guangdong, 510080, China

E-mail: luck\_2001@126.com

E-mail: jixiongfa@gdph.org.cn

Dr.Z.H

Department of Orthopaedics, The Fifth Affiliated Hospital, Southern Medical  
University. No.566, Congcheng Road, Conghua District, Guangzhou510900,  
Guangdong Province, China

E-mail: zhong8099@163.com

S.H

Musculoskeletal Research Laboratory, Department of Orthopaedics & Traumatology,  
Faculty of Medicine, The Chinese University of Hong Kong, No. 437, Ma Liu Shui,  
Shatin, New Territories, Hong Kong SAR, 999077, PR China

Prof.J.X.

Key Laboratory of Biomedical Polymers of Ministry of Education & Department of Chemistry, Wuhan University, Wuhan, 430072, China

E-mail: xljiang@whu.edu.cn

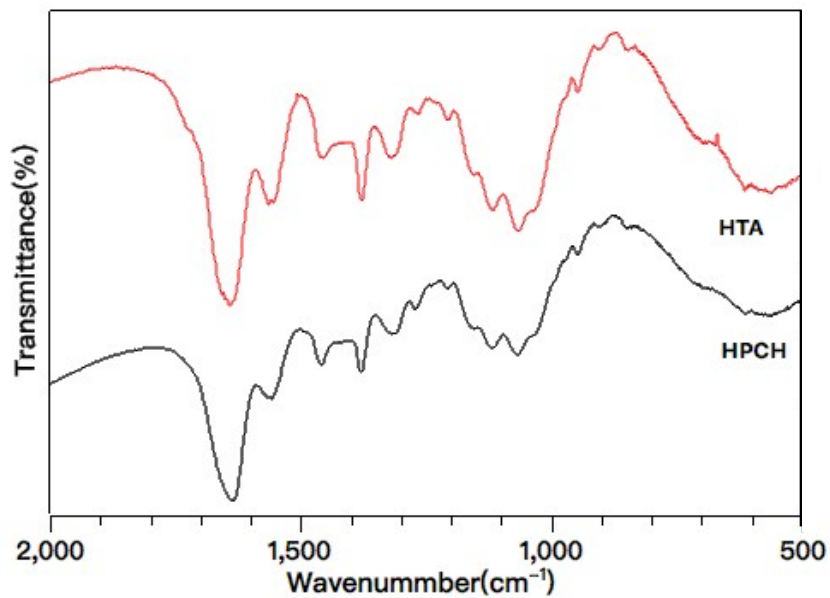

**Figure S1:** FTIR spectra of HPCH and HTA xerogels.

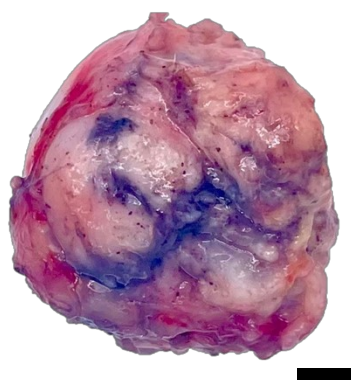

**Figure S2:** Injectability (ex vivo injection of HTA into solid tumors to thoroughly show the distribution of the hydrogel). The scale bar was 3mm, respectively.

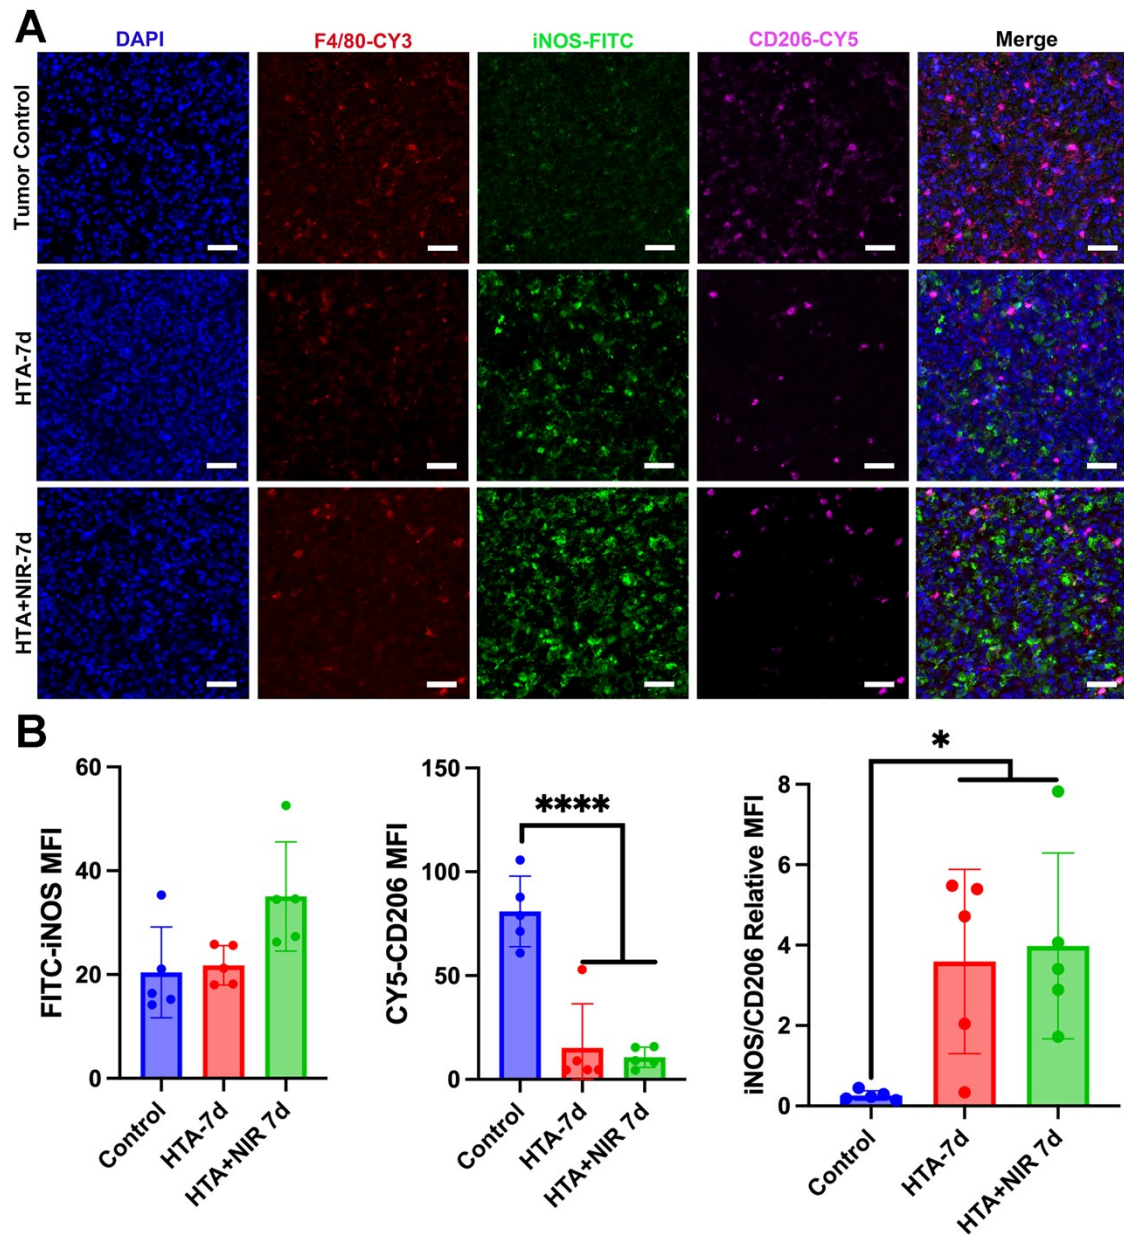

**Figure S3:** Immunofluorescent staining of *in vivo* macrophage reprogramming after 7-day implantation. **(A)** IF staining of tumor-injected HTA 7 d and with 808 nm laser irradiation (macrophages were marked by F4/80, purple; the M1 type was marked by iNOS, green; and the M2 type was marked by CD206, red). The scale bars were 40  $\mu$ m, respectively. **(B)** Mean florescent intensity (MFI) of iNOS and CD206 in polarized macrophages and the iNOS/CD206 ratio (\* indicates  $P < 0.05$ , \*\*\*\* indicates  $P < 0.0001$ ).

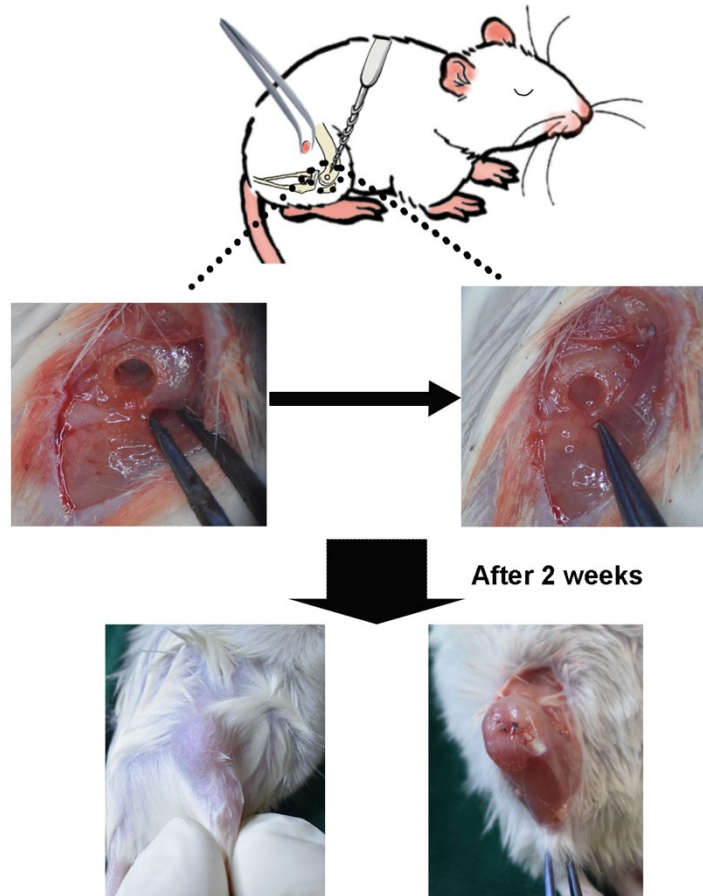

**Figure S4:** *In situ* osteosarcoma model. After exposing the lateral femoral condyle, the periosteum was removed, and a hole was drilled out 2~2.5 mm in diameter and 2.5~3 mm in depth. Drilling through the contralateral bone cortex was failed. Then, the tumor mass was embedded into the bone defect. After 2 weeks, the *in situ* OS model was constructed.

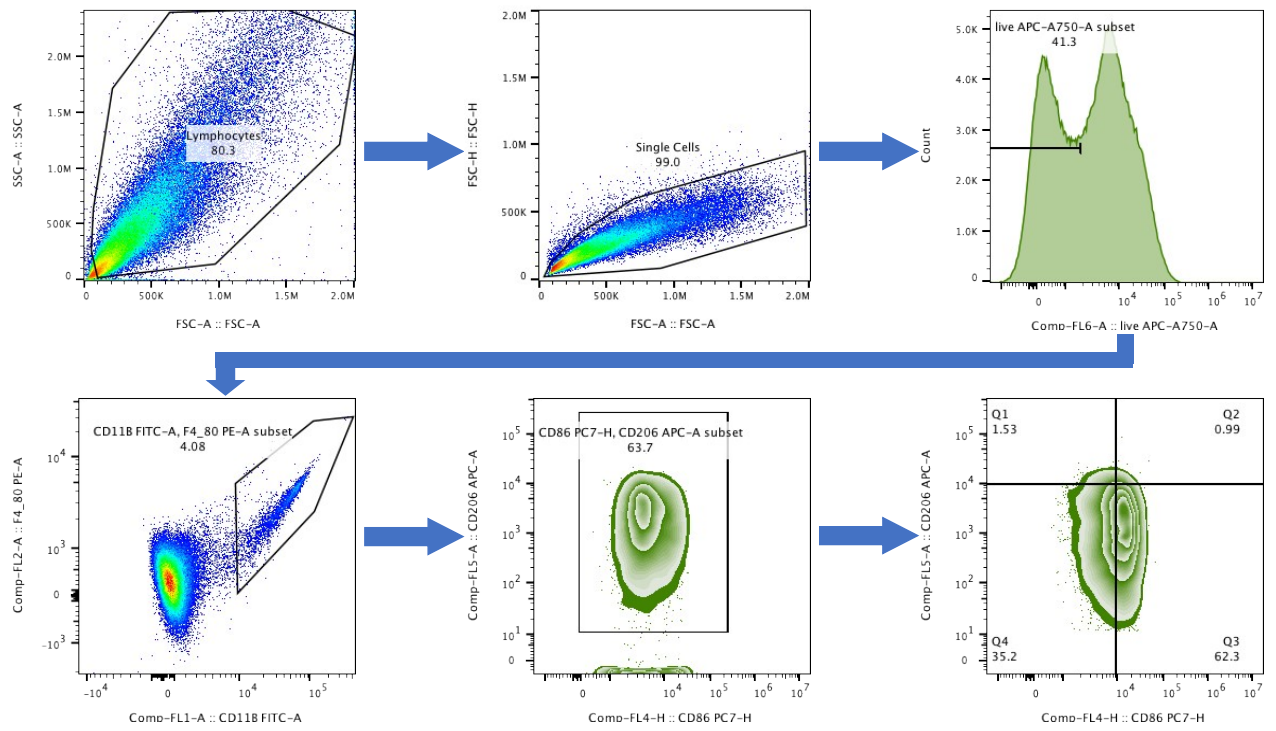

**Figure S5:** Gating steps of flow cytometry analysis of tumor tissue in vivo.

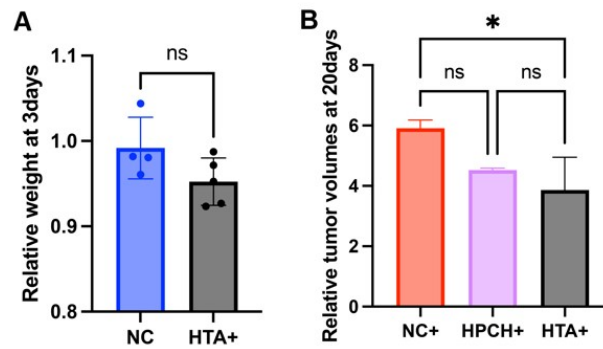

**Figure S6:** (A) Comparison of relative body weight between NC group and HTA+ group on day 3  
 (B) Comparison of relative tumor volumes among NC+, HPCH+, and HTA+ groups at day 20
